# Supplementary material
Source: publisher site journal article supplement (https://www.kjim.org/upload/media/kjim-2025-194-Supplementary-Table-2.pdf)
Supplement: Supplementary file 1 [file kjim-2025-194-Supplementary-Table-2.pdf]

**Supplementary Table 2. Comparison of CKM staging definitions between the American Heart Association (AHA) framework and the modified criteria used in the present study**

| CKM stage | Original AHA definition                                                                                                                                                                                                    | Definition used in the present study                                                                                                                                                                                                                                                                               | Rationale for modification                                                                                                                                           |
|-----------|----------------------------------------------------------------------------------------------------------------------------------------------------------------------------------------------------------------------------|--------------------------------------------------------------------------------------------------------------------------------------------------------------------------------------------------------------------------------------------------------------------------------------------------------------------|----------------------------------------------------------------------------------------------------------------------------------------------------------------------|
| Stage 1   | Overweight, abdominal obesity, dysfunctional adiposity based on BMI, waist-to-hip ratio, or adiposity imaging                                                                                                              | BMI $\geq 23$ kg/m <sup>2</sup> , WC $\geq 85$ cm (women), $\geq 90$ cm (men), or fasting glucose 100–125 mg/dL                                                                                                                                                                                                    | NHIS dataset lacks waist-to-hip ratio and adiposity imaging data. Thus, limited to BMI, WC, and fasting glucose                                                      |
| Stage 2   | Metabolic risk factors including insulin resistance biomarkers, advanced metabolic profiling, hypertension, dyslipidemia, diabetes, or CKD (eGFR 30–59 mL/min/1.73 m <sup>2</sup> )                                        | Metabolic risk factors based on clinical parameters readily available: triglycerides $\geq 135$ mg/dL, hypertension, metabolic syndrome, diabetes (fasting glucose $\geq 126$ mg/dL or medication use), dyslipidemia (statin use or cholesterol $\geq 240$ mg/dL), or CKD (eGFR 30–60 mL/min/1.73 m <sup>2</sup> ) | NHIS dataset does not include advanced insulin resistance biomarkers or metabolic profiling, thus modified to available clinical and laboratory data                 |
| Stage 3   | Subclinical cardiovascular disease identified by cardiac imaging findings (e.g., LVH, coronary calcium scoring, carotid IMT), biomarkers (NT-proBNP, troponin), or high-risk CKD (eGFR $< 30$ mL/min/1.73 m <sup>2</sup> ) | High 10-year cardiovascular risk defined by PREVENT score $\geq 20\%$ or very high-risk CKD (eGFR $< 30$ mL/min/1.73 m <sup>2</sup> )                                                                                                                                                                              | NHIS lacks cardiac imaging and cardiac biomarkers, so imaging/biomarkers replaced with validated risk scores (PREVENT) and severe CKD as proxies for subclinical CVD |
| Stage 4   | Clinical cardiovascular disease (CAD, HF, stroke, PAD, AF) defined by standard clinical definitions                                                                                                                        | Clinical cardiovascular disease similarly defined based on ICD-10 codes and validated procedure codes from hospitalizations (CAD, HF, stroke, PAD, AF)                                                                                                                                                             | Similar criteria, closely following AHA definition using validated NHIS ICD-10 codes                                                                                 |

CKM, cardiovascular-kidney-metabolic; BMI, body mass index; WC, waist circumference; CKD, chronic kidney disease; eGFR, estimated glomerular filtration rate; NHIS, National Health Insurance Service; LVH, left ventricular hypertrophy; IMT, intima-media thickness; NT-proBNP, N-terminal pro-B-type natriuretic peptide; CAD, coronary artery disease; HF, heart failure; PAD, peripheral artery disease; AF, atrial fibrillation; ICD-10, International Classification of Diseases, 10th Revision.
